# Supplementary material
Source: PubMed Central journal article supplement (PMC4959093)

**Prediction of altered bile acid disposition due to inhibition of multiple transporters: An integrated approach using sandwich-cultured hepatocytes, mechanistic modeling and simulation**

Cen Guo, Kyunghye Yang, Kenneth R. Brouwer, Robert L. St. Claire III and Kim L.R. Brouwer

Fig. S1. Simulated effect of telmisartan at (A) 1  $\mu\text{M}$  and (B) 10  $\mu\text{M}$  on TCA  $C_{t,\text{Cells}}$  after a 120-min uptake. Simulations were based on cellular total concentration ( $[I]_{t,\text{cell}}$ ), cellular unbound concentration ( $[I]_{u,\text{cell}}$ ), and cytosolic unbound concentration ( $[I]_{u,\text{cyt}}$ ) measured in this study (Table 3), and telmisartan inhibition constants (Table 1).

**Fig. S1**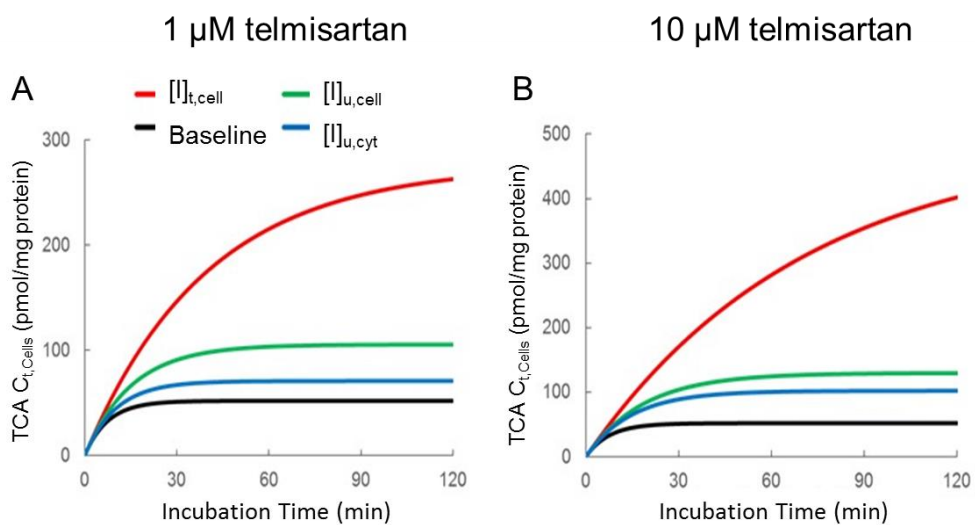

Supplement: supp_116.231928_Supplemental_231928.pdf [file supp_116.231928_Supplemental_231928.pdf]
